# Supplementary material for: Red and near-infrared emitting phosphors based on Eu3+- or Nd3+-doped lanthanum niobates prepared by the sol–gel route
Source: Royal Society of Chemistry journal article supplement (doi:10.1039/d2dt02752f), 2022-01-01
Supplement: d2dt02752f1.pdf [file d2dt02752f1.pdf]

## Supplementary Information

### Red and near-infrared emitting phosphors based on Eu<sup>3+</sup>- or Nd<sup>3+</sup>-doped lanthanum niobates prepared by the sol-gel route

Mateus Grecco Manfré<sup>a</sup>, Hayra do Prado Labaki<sup>a</sup>, Vítor dos S. de Souza<sup>a</sup>, and Rogéria R. Gonçalves<sup>\*a</sup>

<sup>a</sup>Laboratório de Materiais Luminescentes Micro e Nanoestruturados – Mater Lumen, Departamento de Química, FFCLRP, Universidade de São Paulo, SP, Brazil.

\*rrgoncalves@ffclrp.usp.br

#### Table of contents

|                                                                                        |   |
|----------------------------------------------------------------------------------------|---|
| <b>Equation S1.</b> Probability of transition $^5D_0 \rightarrow ^7F_1 (A_{01})$ ..... | 2 |
| <b>Equation S2.</b> Probability of transition $^5D_0 \rightarrow ^7F_2 (A_{02})$ ..... | 3 |
| <b>Equation S3.</b> Probability of transition $^5D_0 \rightarrow ^7F_4 (A_{02})$ ..... | 4 |
| <b>Equation S4.</b> $^5D_0$ radiative transition probability ( $A_T$ ).....            | 5 |
| <b>Equation S5.</b> Radiative Lifetime ( $t_{rad}$ ).....                              | 6 |
| <b>Equation S6.</b> Quantum Efficiency ( $q$ ).....                                    | 7 |
| <b>Figure S1.</b> Color tunability for sample E05.....                                 | 8 |
| <b>References</b> .....                                                                | 8 |

**Equation S1.** Probability of transition  ${}^5D_0 \rightarrow {}^7F_1$  ( $A_{01}$ )

$$A_{01} = 3.1 \cdot 10^{-12} \gamma_{01}^3 n^3$$

where  $\gamma_{01}$  is the baricenter of the  ${}^5D_0 \rightarrow {}^7F_1$  transition and  $n$  the refractive index<sup>1,2</sup>.

**Equation S2.** Probability of transition  ${}^5D_0 \rightarrow {}^7F_2$  ( $A_{02}$ )

$$A_{02} = \frac{S_{02}\gamma_{01}A_{01}}{S_{01}\gamma_{02}}$$

where  $S_{02}$  is the integrated area of the  ${}^5D_0 \rightarrow {}^7F_2$  transition,  $S_{01}$  the integrated area of the  ${}^5D_0 \rightarrow {}^7F_1$  transition,  $A_{01}$  is the probability of the transition  ${}^5D_0 \rightarrow {}^7F_1$ ,  $\gamma_{01}$  the baricenter of the  ${}^5D_0 \rightarrow {}^7F_1$  transition and  $\gamma_{02}$  the baricenter of the  ${}^5D_0 \rightarrow {}^7F_2$  transition<sup>1,2</sup>.

**Equation S3.** Probability of transition  ${}^5D_0 \rightarrow {}^7F_4$  ( $A_{04}$ )

$$A_{04} = \frac{S_{04}\gamma_{01}A_{01}}{S_{01}\gamma_{04}}$$

where  $S_{04}$  is the integrated area of the  ${}^5D_0 \rightarrow {}^7F_4$  transition,  $S_{01}$  the integrated area of the  ${}^5D_0 \rightarrow {}^7F_1$  transition,  $A_{01}$  is the probability of the transition  ${}^5D_0 \rightarrow {}^7F_1$ ,  $\gamma_{01}$  the baricenter of the  ${}^5D_0 \rightarrow {}^7F_1$  transition and  $\gamma_{04}$  the baricenter of the  ${}^5D_0 \rightarrow {}^7F_4$  transition<sup>1,2</sup>.

**Equation S4.**  ${}^5D_0$  radiative transition probability ( $A_T$ )

$$A_T = A_{01} + A_{02} + A_{04}$$

where  $A_{01}$  is the probability of the transition  ${}^5D_0 \rightarrow {}^7F_1$ ,  $A_{02}$  is the probability of the transition  ${}^5D_0 \rightarrow {}^7F_2$  and  $A_{04}$  is the probability of the transition  ${}^5D_0 \rightarrow {}^7F_4^{1,2}$ .

**Equation S5. Radiative Lifetime ( $t_{rad}$ )**

$$t_{rad} = \frac{1}{A_T}$$

where  $A_T$  is the  ${}^5D_0$  radiative transition probability<sup>1,2</sup>.

**Equation S6.** Quantum Efficiency ( $q$ )

$$q = \frac{t_{exp}}{t_{rad}}$$

where  $t_{exp}$  is the experimental lifetime and  $t_{rad}$  the radiative lifetime<sup>1,2</sup>.

**Figure S1-** Color tunability for sample E05

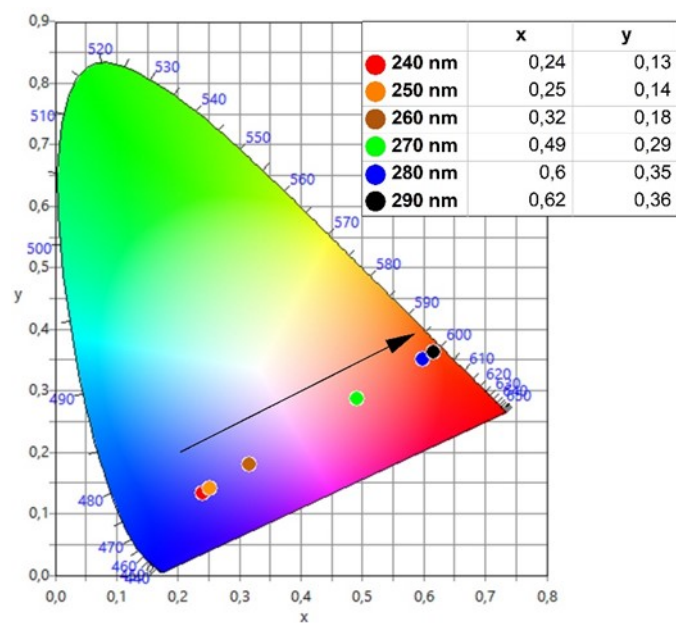

### References

- 1 L. D. Carlos, R. A. S. Ferreira, V. De Zea Bermudez and S. J. L. Ribeiro, *Adv. Mater.*, 2009, **21**, 509–534.
- 2 M. H. V. Werts, R. T. F. Jukes and J. W. Verhoeven, *Phys. Chem. Chem. Phys.*, 2002, **4**, 1542–1548.
